# Supplementary figures and images for: Structural and compositional properties of Er-doped silicon nanoclusters/oxides for multilayered photonic devices studied by STEM-EELS
Source: Royal Society of Chemistry journal article supplement (doi:10.1039/c3nr02754f), 2013-01-01

$\text{FWHM}_{\text{ZLP}} = 0.17 \text{ eV}$ , from  $-0.08$  to  $0.09 \text{ eV}$

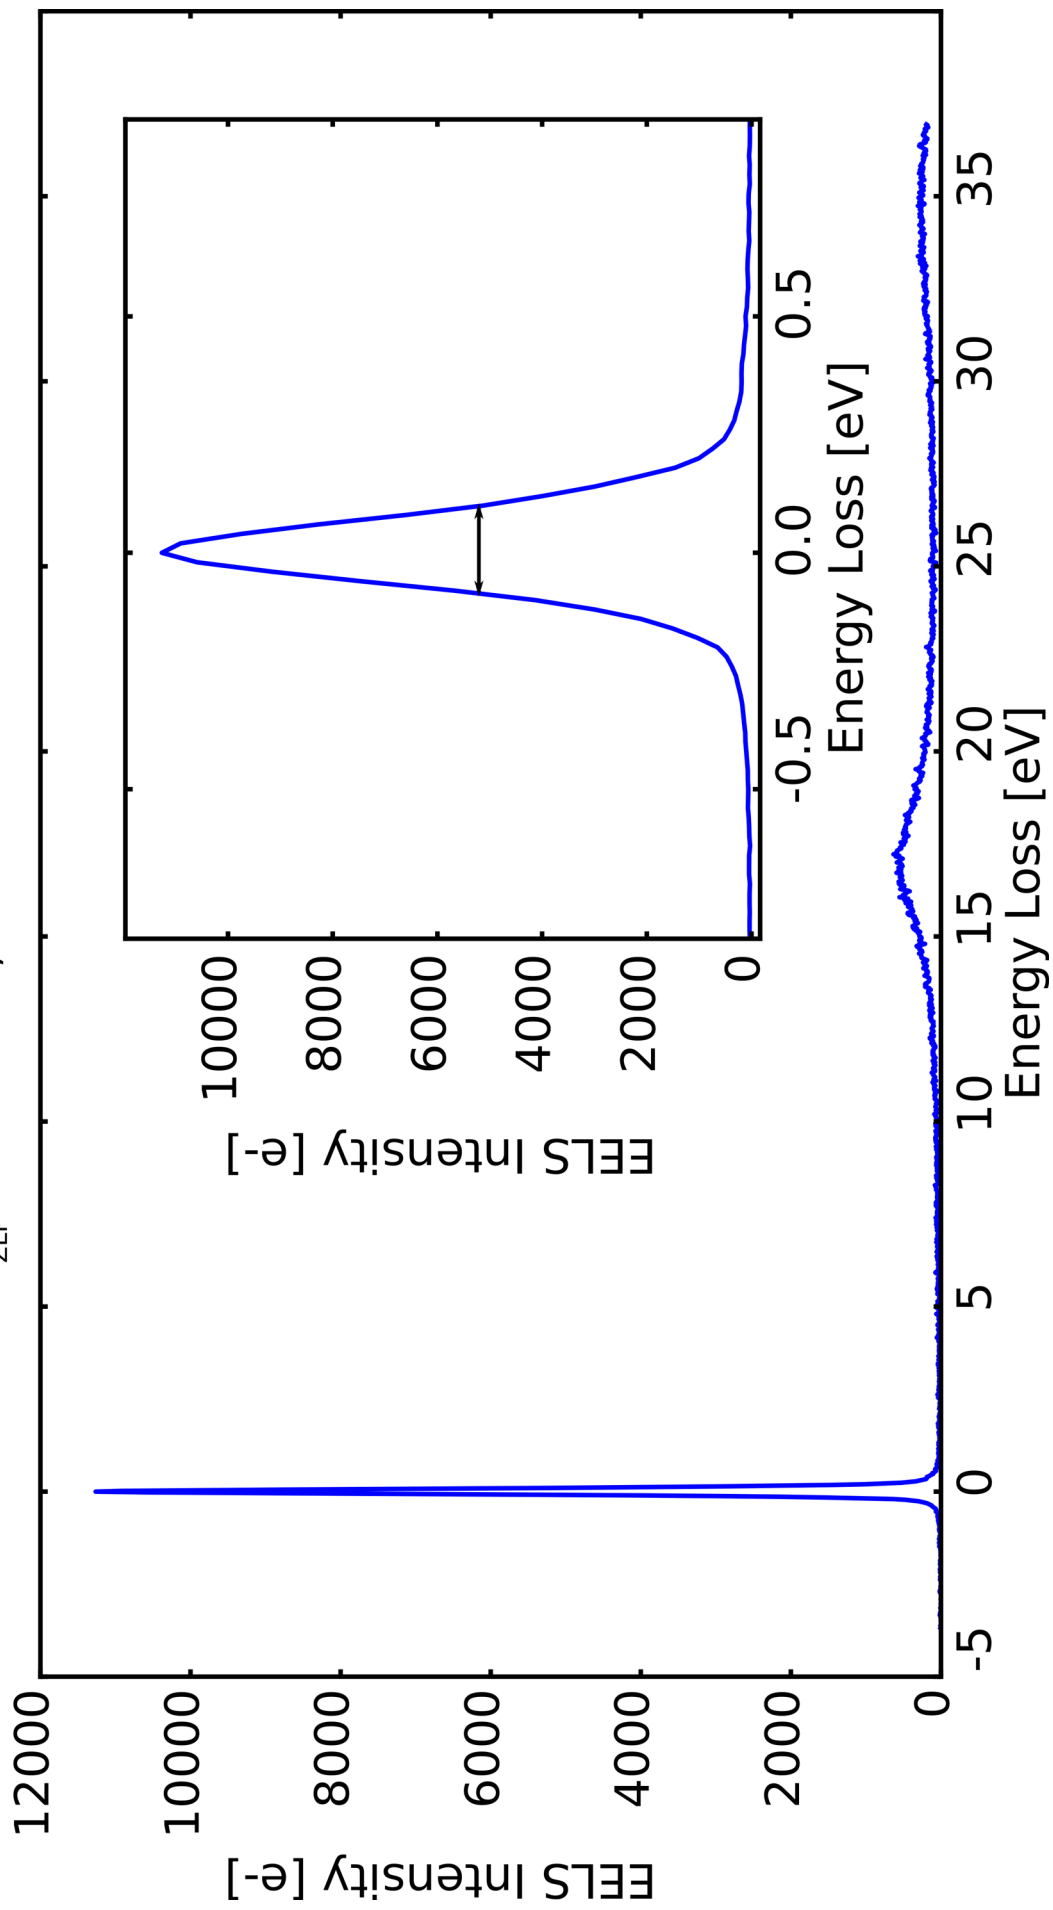

Supplement: c3nr02754f.pdf [file c3nr02754f.pdf]
